1 **Homologous and heterologous boosting of the ChAdOx1-S1-S COVID-19 vaccine with**  
2 **the SCB-2019 vaccine candidate: a randomized, observer-blinded, controlled, phase 2**  
3 **study**

4  
5 Prof. Dr. Sue Ann Costa Clemens,<sup>1,2</sup> Dr. Eveline Pipolo Milan,<sup>3</sup> Dr Eduardo Sprinz,<sup>4</sup> Dr José  
6 Cerbino Neto,<sup>5</sup> Dr. Filippo Pacciarini,<sup>6</sup> Dr. Ping Li,<sup>6</sup> Dr. Hui-Ling Chen,<sup>6</sup> Dr. Igor  
7 Smolenov,<sup>6</sup> Prof. Dr. Andrew Pollard,<sup>1</sup> Dr. Ralf Clemens<sup>7</sup>

- 8  
9 1. Oxford Vaccine Group, Department of Pediatrics, University of Oxford, and the NIHR  
10 Oxford Biomedical Research Centre, Oxford, United Kingdom  
11 2. Siena University, Siena, Italy  
12 3. Centro de Estudos e Pesquisa em Moléstias Infecciosas Ltda. (CEPCLIN), Natal, Brazil  
13 4. Hospital de Clínicas de Porto Alegre, Porto Alegre, Brazil  
14 5. D'Or Institute for Research and Education, Rio de Janeiro, Brazil  
15 6. Clover Biopharmaceuticals Inc., Cambridge, MA, USA.  
16 7. International Vaccine Institute, Seoul, Republic of Korea

17 **ABSTRACT**

18 **Background:** Ongoing outbreaks of COVID-19 are driven by waning immunity following  
19 primary immunizations and emergence of new SARS-CoV-2 variants which escape vaccine-  
20 induced neutralizing antibodies. It has been suggested that heterologous boosters could  
21 enhance and potentially maintain population immunity.

22 **Methods:** We assessed immunogenicity and reactogenicity of booster doses of different  
23 formulations of alum-adjuvanted SCB-2019 vaccine (9 µg SCB-2019 with or without CpG-  
24 1018 adjuvant, or 30 µg SCB-2019 with CpG-1018) in Brazilian adults primed with  
25 ChAdOx1-S vector vaccine. S-protein antibodies and ACE2-binding inhibition were  
26 measured by ELISA on Days 1, 15 and 29. Participants self-reported solicited adverse events  
27 and reactions.

28 **Results:** All SCB-2019 formulations increased S-protein ELISA antibodies and ACE2  
29 binding inhibition to a greater extent than ChAdOx1-S. After 30 µg SCB-2019+CpG+alum  
30 titers against wild-type S-protein were significantly higher than after ChAdOx1-S on Days 15  
31 and 29, as were titers of neutralizing antibodies against wild-type strain and Beta, Gamma,  
32 Delta, and Omicron variants. Boosting with SCB-2019 or ChAdOx1-S was well tolerated  
33 with no vaccine-related serious or severe adverse events.

34 **Conclusions:** Boosting ChAdOx1-S-primed adults with SCB-2019 induced higher levels of  
35 antibodies against a wild-type strain and SARS-CoV-2 variants than a homologous  
36 ChAdOx1-S booster, highest responses being with the 30 µg SCB-2019+CpG+alum  
37 formulation.

38 **KEYWORDS**

39 COVID-19; vaccine; booster; heterologous; homologous, SCB-2019; ChAdOx1-S

40 **Registered on ClinicalTrials.gov, NCT 05087368**

41 **Conflict of Interest statement**

42 FP, PL, IE, H-LC, and IS are all full-time employees of the study sponsor. SACC and RC are  
43 scientific advisors to the study sponsor. EPM, ES, JCN and AP declare they have no conflicts  
44 to declare. All authors have submitted the ICMJE Form for Disclosure of Potential Conflicts  
45 of Interest and conflicts that the editor considers relevant to the content of the manuscript  
46 have been disclosed.

47

48 **Funding statement**

49 The study was sponsored by Clover Biopharmaceuticals Inc. and was supported by grant  
50 from Bill & Melinda Gates Foundation (BMGF), No. INV-030336.

51

52 **Corresponding Author**

53 Dr. Ralf Clemens,  
54 International Vaccine Institute,  
55 SNU Research Park,  
56 1 Gwanak-ro,  
57 Gwanak-gu,  
58 Seoul,  
59 08826 Korea  
60 E-mail: [clemens.ralf@outlook.com](mailto:clemens.ralf@outlook.com)

61

62 **INTRODUCTION**

63 The COVID-19 pandemic has been ongoing for two years, during which time large  
64 proportions of high-income country populations have achieved vaccine-induced immunity  
65 following national immunization campaigns [1]. However, new variants of the wild-type  
66 severe acute respiratory syndrome coronavirus 2 (SARS-CoV-2) from Wuhan have continued  
67 to emerge each displaying new mutations of the Spike protein (S-protein) [2]. As the S-  
68 protein is the main antigenic target of most of the authorized vaccines, the accumulating  
69 mutations have resulted in these new variants becoming successively less susceptible to the  
70 neutralizing immunity induced by the first immunization campaigns [3–7]. This has resulted  
71 in new waves of pandemic COVID-19 outbreaks, most notably associated with the Beta  
72 (B.1.351), Gamma (P.1), Delta (B.1.617.2) and Omicron (B.1.1.529) variants [8]. The  
73 efficacy of authorized vaccines against infection has been seen to decrease with each new  
74 variant, both due to waning immunity following immunization and the changes in the  
75 antigenic target, while protection against severe disease is largely preserved.

76 This has led to the implementation of further immunization campaigns with booster doses of  
77 vaccines to broaden the immune response. Early indications are that heterologous boosters  
78 are mostly more effective than homologous boosters [9–11]. Most data on such immunity has  
79 been obtained with the mRNA vaccines which were the first to be authorized for use in  
80 immunization campaigns and have been widely used in high-income countries. However,  
81 many low- and middle-income countries are still in the phase of implementing full primary  
82 immunization of their populations, with widespread use of viral vector (e.g., ChAdOx1-S1;  
83 AstraZeneca, United Kingdom) or inactivated (e.g., CoronaVac; Sinovac Biotech, China)  
84 vaccines. Clover Biopharmaceuticals has developed a recombinant SARS-CoV-2 S-protein  
85 vaccine (S-Trimer), SCB-2019, that has been stabilized in the native pre-fusion trimeric  
86 conformation using the company's proprietary Trimer-Tag<sup>®</sup> technology and adjuvanted with

87 the toll-like receptor 9 (TLR 9) agonist CpG-1018 and alum. The SPECTRA phase 2/3  
88 efficacy trial demonstrated that two 30 µg doses of SCB-2019 had 67.2% (95.72% CI: 54.3–  
89 76.8) efficacy against any COVID-19, and specific efficacies (with 95% CI) of 78.7% (57.3–  
90 90.4), 91.8% (44.9–99.8) and 58.6% (13.3–81.5) against Delta, Gamma and Mu variants,  
91 respectively [12]. The present study was conducted to investigate use of SCB-2019 in  
92 heterologous booster regimens compared with homologous boosters in individuals who have  
93 received a two-dose primary vaccination series of the adenovirus-vector vaccine, ChAdOx1-  
94 S, which was authorized in Brazil. We assessed safety and immunogenicity of different  
95 formulations of SCB-2019; low dose (9 µg) SCB-2019 and alum, with and without the CpG-  
96 1018 adjuvant to investigate possible dose-sparing, and the standard 30 µg dose formulated  
97 with CpG-1018 and alum used in the SPECTRA efficacy trial. These were given as a  
98 heterologous booster in persons primed with two doses of ChAdOx1-S and responses  
99 compared with a dose of ChAdOx1-S given as a homologous booster.

## 100 **METHODS**

101 This phase 2 randomized, controlled, observer-blinded, multi-center study is ongoing at three  
102 sites in Brazil: Hospital de Clínicas de Porto Alegre, Hospital Gloria D'or, Rio de Janeiro and  
103 Centro de Estudos e Pesquisa em Moléstias Infecciosas (CEPCLIN), Natal. The study  
104 protocol was approved by each hospital's Ethical Review committee and conducted  
105 according to the Declaration of Helsinki and Council for International Organizations of  
106 Medical Sciences International ethical guidelines and ICH GCP guidelines. The protocol was  
107 registered on ClinicalTrials.gov, registration number NCT 05087368. Participants supplied  
108 written informed consent at enrolment. The objective reported here was to select the optimal  
109 SCB-2019 formulation to use in the heterologous boosting of individuals primed with two  
110 doses of ChAdOx1-S1-S vaccine. Selection was to be based on the safety and  
111 immunogenicity, and potential impact on supply of the chosen formulation, i.e. dose-sparing.

112 ***Participants***

113 Eligible participants were male or female adults,  $\geq 18$  years of age who had previously  
114 received two doses of ChAdOx1-S1-S vaccine 6 months ( $\pm 4$  weeks) before enrolment and  
115 were willing and able to comply with study requirements, including all scheduled visits,  
116 vaccinations, laboratory tests, and other study procedures. Inclusion criteria included being  
117 healthy or having a pre-existing but stable medical condition at the screening examination,  
118 the main exclusion criterion being any previous laboratory-confirmed SARS-CoV-2  
119 infection.

120 ***Vaccine***

121 The investigational SCB-2019 vaccine was supplied in a 1.0-mL pre-filled syringe containing  
122 720  $\mu\text{g}$  SCB-2019. Adjuvants were CpG-1018 (Dynavax Technologies) presented in a 2.0 ml  
123 vial containing 12 mg/mL of a 22-mer phosphorothioate oligodeoxynucleotide in Tris  
124 buffered saline (24 mg per vial), and aluminium hydroxide (Alhydrogel®, Croda Health  
125 Care) supplied in vials of 10 mg/mL. The final vaccine formulations per dose contained  
126 either 30  $\mu\text{g}$  SCB-2019 with 1.5 mg CpG-1018 and 0.75 mg alum in a 0.5 mL volume, as  
127 used in the reported efficacy trial [12], 9  $\mu\text{g}$  SCB-2019 with 0.225 mg alum in a 0.15 mL  
128 dose, or 9  $\mu\text{g}$  SCB-2019 with 0.45 mg CpG-1018 and 0.225 mg alum in a 0.15 mL volume.  
129 The comparator vaccine (ChAdOx1-S1-S) was Fiocruz COVID-19 vaccine (Rio de Janeiro,  
130 Brazil) containing a Chimpanzee Adenovirus (ChadOx1) encoding the SARS-CoV-2 Spike  
131 glycoprotein, with not less than  $2.5 \times 10^8$  infectious units (Inf.U) in each 0.5 ml dose. These  
132 vaccine formulations were prepared on the day of use by trained unblinded vaccine  
133 administrators who administered them by intramuscular injection in the upper deltoid of the  
134 non-dominant arm. For accurate administration of the 0.15 mL volume 1 mL tuberculin  
135 syringes (Precisionglide, Becton Dickenson) were used. These vaccine administrators played

136 no further part in the study and all other study staff and the investigators and participants  
137 were masked to which vaccine had been given.

### 138 ***Procedures***

139 At enrolment participants were randomly allocated 1:1:1:1 using a block size of 8 to four  
140 equal groups to receive a third dose of ChAdOx1-S1 or a dose of one of the three  
141 formulations of SCB-2019. At their first study visit on Day 1, after providing their baseline  
142 blood sample, participants received their assigned vaccination and were monitored for 30  
143 minutes for any immediate reactions. Using diary cards they then recorded for 7 days the  
144 occurrence of solicited local reactions (pain, erythema and swelling at the injection site) and  
145 systemic adverse events (fatigue, headache, myalgia, arthralgia, loss of appetite, nausea,  
146 chills, fever [axillary temperature  $\geq 38^{\circ}\text{C}$ ]) daily, together with any unsolicited adverse  
147 events, serious adverse events (SAE) or medically attended adverse events (MAAE)  
148 occurring up to the third study visit on Day 29. At this study visit the investigator assessed  
149 any reported AE as mild (no interference with daily activities), moderate (interferes with  
150 daily activities) or severe (prevents daily activity) and the relationship to the study  
151 procedures.

### 152 ***Immunogenicity***

153 Serum samples obtained on Day 1 (before vaccination) and at the second (Day 15) and third  
154 (Day 29) visits were used to assess immune responses. The primary endpoint was the  
155 response assessed by ELISA as IgG antibodies against SCB-2019 S-protein on Days 15 [12].  
156 Inhibition of binding of S-protein to the human angiotensin converting enzyme 2 (ACE2) was  
157 measured using a competitive ELISA with SCB-2019. Additional exploratory analyses  
158 included virus neutralizing activity (VNA) titers measured on Days 1, 15 and 29 in a

159 microneutralization assay (MN<sub>50</sub>) against the prototype Wuhan strain and the Beta (B.1.351),  
160 Delta (B.1.617.2), Gamma (P.1) and Omicron (B.1.1.529) variants of SARS-CoV-2.

### 161 *Statistics*

162 There was no formal hypothesis tested in this first stage of the study, all results being  
163 presented and analyzed descriptively. The sample size was considered adequate for the  
164 purposes of down-selection of formulation. The primary immunogenicity endpoint was  
165 ELISA antibody titers against SCB-2019 S-protein expressed as geometric mean titers  
166 (GMT), geometric mean-fold rise in titers over baseline (GMFR) and seroconversion rates  
167 (SCR) on Days 15 and 29 in all participants who received the correct vaccination and had no  
168 major protocol deviation reported or suffered a COVID-19 infection prior to blood draw.  
169 Seroconversion was defined as a  $\geq 4$ -fold increase in post-vaccination titer in those with a  
170 baseline titer above the lower limit of quantitation (LLOQ), or a post-vaccination titer  $\geq 4$ -  
171 fold the LLOQ in those with no detectable activity at baseline. Comparisons between groups  
172 were made by ANCOVA model with vaccine group as a fixed variable, baseline antibody  
173 result and site as covariates. Immunogenicity results against the different SARS-CoV-2  
174 variants are also expressed as GMTs, GMFR and SCR for group and variant. GMTs of  
175 neutralizing antibodies against prototype strain ELISA GMTs against SCB-2019 S-protein  
176 are presented in IU/mL, GMTs of neutralizing antibodies against variants and ACE2 are  
177 expressed in reciprocal units. Safety data is presented descriptively as proportions of groups  
178 (percentage) reporting any solicited reaction or adverse event or unsolicited adverse events.

179

## 180 **RESULTS**

181 Recruitment began on November 26, 2021 and the last volunteer was enrolled on March 7,  
182 2022. During this period there was a major outbreak of Omicron infections. Of 144



183 volunteers screened a total of 120 volunteers were enrolled and randomized to the four study  
184 groups (**Figure 1**). Only two enrolled participants did not complete through visit 3; one was  
185 lost to follow-up from Group 1 after visit 1 and the second was lost to follow-up from Group  
186 2 after visit 2. All of the remaining 118 randomized participants completed through visit 3,  
187 except for one from Group 1 who did not provide blood for immunology assessment.  
188 Demographics in the four study groups were comparable (**Table 1**). Over the course of the  
189 study there were 30 suspected cases of COVID-19 in the study population, 26 of which were  
190 confirmed by RT-PCR and 2 by rapid antigen test (RAT). These occurred in all four study  
191 groups with onset from 8 to 77 days after vaccination (**Table 1**). Three cases had onset before  
192 Day 15, and a further ten before Day 29, the remaining 17 having onset after visit 3. The  
193 participants with confirmed COVID-19 infection before the second blood sample were  
194 excluded from the relevant immunogenicity analyses.

### 195 ***Immunogenicity***

196 Vaccination in any of the four study groups resulted in increases in titers of binding  
197 antibodies against SCB-2019 and inhibition of S-protein binding to ACE2 which were  
198 notably higher in Groups 1–3 which received the heterologous SCB-2019 formulation than  
199 Group 4 after a homologous ChAdOx1-S booster (**Figure 2**). Following the SCB-2019  
200 boosters these increases were apparently dose dependent; in Groups 1 and 2 which received 9  
201 µg SCB-2019 the respective GMFR from Day 1 were 9 and 11 at Day 15 and 8 and 9 at Day  
202 29, while in Group 3 the GMFR were 18 and 16 at Days 15 and 29 suggesting the 30 µg  
203 SCB-2019 dose was more effective in inducing a booster response (**Figure 2A**). Notably, all  
204 three SCB-2019 groups elicited significantly higher GMFR than the four-fold increase  
205 elicited by the homologous ChAdOx1-S booster vaccination at Day 15. The response  
206 increased further in Group 4 at Day 29, but the significant difference persisted between  
207 Groups 3 and 4.

208 A similar profile was observed when measuring ACE2 binding (**Figure 2B**) with higher fold-  
209 increases in all groups at Days 15 and 29 than with the S-protein assay, which were still dose  
210 dependent in the SCB-2019 groups. This immune response was significantly higher in  
211 Groups 2 and 3 than in Group 4, the ChAdOx1-S-boosted group and this significant  
212 difference persisted at Day 29 when all four groups displayed higher titers with GMFR  
213 ranging from 23 to 34 in the three SCB-2019 groups compared with a GMFR of 12 in the  
214 ChAdOx1-S group.

215 When assessed for neutralizing activity against the prototype strain and the different SARS-  
216 CoV-2 variants at Day 15 these differences between different doses of SCB-2019 and  
217 between SCB-2019 and ChAdOx1-S were still evident (**Figure 3**). All groups displayed  
218 neutralizing activity against all five variants at baseline, the highest responses being against  
219 the prototype Wuhan virus and the lowest against the most recent variant, Omicron  
220 (B.1.1529). Two weeks after vaccination there were marked increases against all five variants  
221 in all four groups, with significantly higher increases after heterologous SCB-2019 doses in  
222 Groups 2 and 3 than the homologous ChAdOx1-S dose in Group 4. Overall, the biggest  
223 increases in SCB-2019 groups were against prototype virus with GMFR ranging from 10 to  
224 15 (**Table 2**) and Delta variant (GMFR 9 to 17), and lowest against Omicron with GMFR  
225 ranging from 4 to 6. The GMFR in Group 4, after a booster ChAdOx1-S vaccination, ranged  
226 from 2 to 5 for the different variants. When the GMTs of each group vs Group 4 were  
227 compared the responses in Groups 2 and 3 were significantly higher than Group 4 against all  
228 variants (**Figure 3**). Similarly, seroconversion rates for each variant were highest with the 30  
229  $\mu$ g SCB-2019 formulation, with a notably higher response against Omicron than the  
230 homologous ChAdOx1-S booster (**Table 2**). Interestingly, the significant differences between  
231 Groups 2 and 4, the low-dose fully adjuvanted SCB-2019 and ChAdOx1-S, did not persist to

232 Day 29 except for the Gamma variant. This was due in equal parts to waning titers in Group 2  
233 and increasing titers in Group 4.

### 234 *Safety*

235 Overall, all four vaccine formulations were well tolerated, with no vaccine-related serious or  
236 severe adverse events, no withdrawals due to an AE and no deaths (**Table 3**). The only  
237 reported SAE was a leg fracture which was not related to the study procedures. One female  
238 participant with a history of hypertension and prior COVID-19 infection reported a mild  
239 allergic reaction 13 days after vaccination which resolved but was repeated 5 days later. The  
240 investigator considered the first occurrence to be related to the study vaccine, but not the  
241 second.

242 There were no clinically meaningful differences in rates of solicited local reactions between  
243 the groups. Rates were highest in Group 2 (41%) and Group 3 (47%), after 9 µg and 30 µg  
244 SCB-2019 with CpG and alum, respectively. The rate was lower (29%) in Group 1 who  
245 received 9 µg SCB-2019 with alum alone. After the homologous ChAdOx1-S vaccination  
246 33% of Group 4 reported a local reaction. Local reactions in all four groups mainly consisted  
247 of mild pain at the injection site with a few cases described as moderate but none as severe  
248 (**Figure 4**). Solicited systemic AEs were most frequently reported after the ChAdOx1-S in  
249 Group 4 (63%), with lower rates (39% to 43%) in the SCB-2019 groups. The most frequent  
250 solicited systemic AEs were headache, fatigue and myalgia (**Figure 4**), which were mainly  
251 mild and transient, with no severe cases reported. As with local reactions there were no  
252 clinically meaningful differences in systemic AEs between groups. There were no AESIs or  
253 severe unsolicited AEs reported over the course of the study.

254 As noted, there were 30 cases of COVID-19 reported, including 13 from Day 1 to Day 29  
255 when immunogenicity was assessed. Of these 25 were considered to be mild and 5 as

256 moderate in severity; no cases were described as severe or had associated pneumonia or  
257 required hospitalization.

258

## 259 **DISCUSSION**

260 This study is the first investigation of boosting immune responses with Clover's recombinant  
261 SARS-CoV-2 S-trimer fusion protein vaccine (SCB-2019) as a heterologous vaccine to the  
262 primary vaccine. This study also investigated the use of a lower dose of SCB-2019, with and  
263 without the CpG-1018 adjuvant, to allow for dose-sparing. The data show that the best  
264 booster response in participants primed with two doses of the adenoviral vector vaccine,  
265 ChAdOx1-S, was provided by the standard formulation containing 30 µg SCB-2019 with the  
266 toll-like receptor 9 agonist CpG-1018 and alum. This formulation demonstrated 67.2%  
267 efficacy against COVID-19 of any severity in the SPECTRA study and 100% efficacy  
268 against severe disease [12]. As a heterologous booster it was not associated with any safety  
269 concerns and had acceptable reactogenicity, comparable to that observed in the SPECTRA  
270 study following primary immunizations [12]. The 30 µg SCB-2019 dose elicited significantly  
271 higher immunity against the two key antigenic targets, measured as antibodies against SARS-  
272 CoV-2 S-protein and inhibition of the binding of S-protein to the ACE2 receptor, than the  
273 homologous ChAdOx1-S vaccine. Further, neutralizing antibody responses against four of  
274 the major SARS-CoV-2 variants were significantly higher than with the homologous  
275 ChAdOx1-S vaccine. These observations are important as ChAdOx1-S has been shown to be  
276 highly protective against severe disease and death since its global roll out.

277 One exception was the level of neutralizing activity against the Omicron variant; although  
278 significantly lower 15 days after homologous boosting than with heterologous with SCB-  
279 2019+CpG+alum formulations, titers against Omicron were comparable at Day 29. This was

280 partly due to a continuing increase in these titers in the ChAdOx1-S group while they waned  
281 slightly in the SCB-2019 groups. The question of whether this indicates a difference in the  
282 kinetics of the response to the homologous booster requires further investigation. It has  
283 previously been observed that the immune response to a heterologous second vaccination  
284 using mRNA vaccines after a primary dose of ChAdOx1-S is more rapid than the  
285 homologous vaccination, but we are unaware of similar observations with a protein or  
286 inactivated vaccine [13].

287 The COVID-19 pandemic has decreased in severity but has endured in numbers of infections  
288 with the appearance of new variants which despite appearing to be less sensitive to vaccine-  
289 induced immunity, are also leading to less severe forms of disease with fewer hospitalizations  
290 and deaths [14]. However, SARS-CoV-2 remains a threat to global health, and the experience  
291 of a series of novel variants emerging and rapidly predominating in circulation highlights the  
292 potential for future outbreaks. In a situation analogous to influenza, in a population that now  
293 has immune experience due to infection or vaccination, future variants may lead to seasonal  
294 outbreaks. For that reason, it is essential that high levels of immunity are maintained in global  
295 populations to ensure there are no more explosive outbreaks of serious illness such as those  
296 the world has recently experienced [15].

297 Many countries have already achieved high levels of immunity, notably those high-income  
298 countries that were able to initiate mass immunization campaigns with the first vaccines to be  
299 authorized, mainly the mRNA and vector vaccines targeting the S-protein of the prototype  
300 virus [1]. Middle- and low-income countries are now playing catch-up, typically using less  
301 expensive and more easily managed inactivated vaccines. However, the steady emergence of  
302 a series of novel variants, the majority of which have changes in the main antigenic target,  
303 the S-protein, has seen a decline in the extent of protective immunity afforded by the initial  
304 vaccines [3–8]. The combination of waning antibodies and lower immunity against the novel

305 variant has caused resurgence of COVID-19 outbreaks around the world, which may be  
306 countered by use of booster vaccinations [16]. Unfortunately, boosters only provide a  
307 temporary solution as waning immunity and emergence of new escape variants means that  
308 the added protection will be short-lived.

309 Evidence so far suggests that in most cases boosting with a heterologous vaccine is more  
310 effective than homologous boosters [17–19] which this report appears to confirm with the  
311 heterologous SCB-2019 booster eliciting higher immunity than a dose of the heterologous  
312 ChAdOx1-S vaccine. In view of the global need for more COVID-19 vaccines we also  
313 assessed the effect of a reduced dose of SCB-2019 to allow dose-sparing as well as omitting  
314 the CpG-1018 adjuvant, which may also be dose-limiting. Our results suggest that both  
315 formulations of SCB-2019 with CpG and alum containing 9 µg or 30 µg doses, provide an  
316 important boost in immunity with no evidence of increased reactogenicity.

317 This is a small study with several limitations as a consequence, but the trends are  
318 confirmation of other observations. Several studies have shown that heterologous booster  
319 vaccination can heighten and broaden the immune response compared with homologous  
320 booster doses [17–19]. We restricted this study to one priming vaccine, ChAdOx1-S, but  
321 results need to be confirmed with other vaccines, particularly mRNA and inactivated  
322 vaccines. We only assessed the immune responses out to four weeks after the booster  
323 vaccination, and persistence of any improved immune responses following the heterologous  
324 and homologous boosters will have to be assessed. Finally, we did not assess the efficacy of  
325 the booster immunization; although there were several cases of COVID-19 reported in this  
326 small study population it was not designed to include an efficacy assessment which would  
327 also require a placebo group. Notably, none of these cases were severe and there were no  
328 hospitalizations due to COVID-19.

329 In conclusion, the formulation of 30 µg SCB-2019 adjuvanted with CpG-1018 and alum is  
330 safe and well tolerated and as a heterologous booster vaccine in those previously primed with  
331 ChAdOx1-S and is immunologically more effective than that same vaccine given as a  
332 homologous booster.

333

334 **ACKNOWLEDGEMENTS**

335 The authors wish to thank all participants and our co-investigators Drs. Tannyth Gomes dos  
336 Santos, Karla Cristina Marques Afonso Ferreira de Souza, and Deyvison Soares da Costa at  
337 CEPCLIN, Natal; Drs. Thaina Garbino, Larisse Longo, and Caroline Portela at Hospital de  
338 Clínicas de Porto Alegre, Porto Alegre; and Drs. Bruno Pereira Stuchi, Luciana Gomes Pedro  
339 Brandão, and Marcellus Dias da Costa at Hospital Glória D’or, Rio de Janeiro for their  
340 invaluable contribution to this study. We are grateful to all the personnel at Vismederi SRL  
341 (Siena, Italy) for their expertise in performing the immunogenicity assays, to the staff at  
342 Smerud Medical Research (Oslo, Norway) for data management, and to Intriials (São Paulo,  
343 Brazil) for their conduct of the study. The ChAdOx1-S vaccine used in the study was  
344 generously provided by the Ministry of Health (Brasília, Brazil). The authors are grateful to  
345 Keith Veitch (keithveitch communications, Amsterdam, the Netherlands) for assistance with  
346 preparation and editorial management of the manuscript.



347 **REFERENCES**

- 348 1. Our World in Data. Coronavirus (COVID-19) vaccinations. Apr 24, 2021.  
349 <https://ourworldindata.org/covid-vaccinations> Accessed on April 24, 2022.
- 350 2. Candido KL, Eich CR, de Fariña LO, et al. Spike protein of SARS-CoV-2 variants: a  
351 brief review and practical implications. *Braz J Microbiol* 2022 Apr 9;1–25.
- 352 3. Murano K, Guo Y, Siomi H. The emergence of SARS-CoV-2 variants threatens to  
353 decrease the efficacy of neutralizing antibodies and vaccines. *Biochem Soc Trans* 2021;  
354 49:2879-90.
- 355 4. Madhi SA, Baillie V, Cutland CL, et al. Efficacy of the ChAdOx1 nCoV-19 Covid-19  
356 vaccine against the B.1.351 variant. *N Engl J Med* 2021; 384:1885–98.
- 357 5. V. Shinde S, Bhikha S, Hoosain Z, et al. Efficacy of NVX-CoV2373 Covid-19 vaccine  
358 against the B.1.351 variant. *N Engl J Med* 2021; 384:1899–1909.
- 359 6. Noor R, Shareen S, Billah M. COVID-19 vaccines: their effectiveness against the  
360 severe acute respiratory syndrome coronavirus 2 (SARS-CoV-2) and its emerging  
361 variants. *Bull Natl Res Cent* 2022; 46:96.
- 362 7. Keegan LT, Truelove S, Lessler J. Analysis of vaccine effectiveness against COVID-19  
363 and the emergence of Delta and other Variants of Concern in Utah. *JAMA Network*  
364 *Open* 2021; 4:e2140906.
- 365 8. Alcantara LCJ, Nogueira E, Shuab G, et al. SARS-CoV-2 epidemic in Brazil: how  
366 variants displacement have driven distinct epidemic waves. *Virus Res* 2022; 198785.  
367 Online ahead of print DOI: 10.1016/j.virusres.2022.198785.
- 368 9. Pozzetto B, Legros V, Djebali S, et al. Immunogenicity and efficacy of heterologous  
369 ChAdOx1-BNT162b2 vaccination. *Nature* 2021; 600:701–6.
- 370 10. Groß R, Zanoni M, Seidel A, et al. Heterologous ChAdOx1 nCoV-19 and BNT162b2  
371 prime-boost vaccination elicits potent neutralizing antibody responses and T cell  
372 reactivity against prevalent SARS-CoV-2 variants. *EBioMedicine* 2022; 75:103761.
- 373 11. Jara A, Undurraga EA, Zubizarreta JR, et al. Effectiveness of homologous and  
374 heterologous booster doses for an inactivated SARS-CoV-2 vaccine: a large-scale  
375 prospective cohort study. *Lancet Glob Health* 2022 Published Online April 23, 2022  
376 [https://doi.org/10.1016/S2214-109X\(22\)00112-7](https://doi.org/10.1016/S2214-109X(22)00112-7)

- 377 12. Bravo L, Smolenov I, Han HH, et al. Efficacy of the adjuvanted subunit protein  
378 COVID-19 vaccine, SCB-2019: a phase 2 and 3 multicentre, double-blind, randomised,  
379 placebo-controlled trial. *Lancet* 2022; 399:461–72.
- 380 13. Markewitz R, Juhl D, Paiuli D, et al. Kinetics of the antibody response to boosting  
381 with three different vaccines against SARS-CoV-2. *Front Immunol* 2022; 13:811020.
- 382 14. Wrenn JO, Pakal SB, Vestal G, et al. COVID-19 severity from Omicron and Delta  
383 SARS-CoV-2 variants. *Influenza Other Respir Viruses* 2022 Online ahead of print Apr  
384 13. doi: 10.1111/irv.12982.
- 385 15. Soraci L, Lattanzio F, Soraci G, et al. COVID-19 vaccines: current and future  
386 perspectives. *Vaccines (Basel)* 2022; 10:608.
- 387 16. Menni C, May A, Polidori L, et al. COVID-19 vaccine waning and effectiveness and  
388 side-effects of boosters: a prospective community study from the ZOE COVID Study.  
389 *Lancet Infect Dis* 2022 Online ahead of print Apr 8;S1473-3099(22)00146-3.
- 390 17. Hayashi JY, Simizo A, Miyamoto JG, et al. Humoral and cellular responses to  
391 vaccination with homologous CoronaVac or ChAdOx1 and heterologous third dose  
392 with BNT162b2. *J Infect Dis* 2022; Online ahead of print Feb 27;S0163-  
393 4453(22)00115-3. doi: 10.1016/j.jinf.2022.02.026.
- 394 18. Cohen G, Jungsomsri P, Sangwongwanich J, et al. Immunogenicity and reactogenicity  
395 after heterologous prime-boost vaccination with CoronaVac and ChAdox1 nCov-19  
396 (AZD1222) vaccines. *Hum Vaccin Immunother* 2022 Online ahead of print Mar 24;1-  
397 7. doi: 10.1080/21645515.2022.2052525.
- 398 19. Parker EPK, Desai S, Marti M, et al. Emerging evidence on heterologous COVID-19  
399 vaccine schedules—To mix or not to mix? *Lancet Infect Dis* 2022; 22:P438–40.

400

**Table 1.** Demographics of the participants in the Full Analysis Set (FAS).

| Characteristics                                    | Group 1                 | Group 2                       | Group 3                        | Group 4      |
|----------------------------------------------------|-------------------------|-------------------------------|--------------------------------|--------------|
|                                                    | 9 µg SCB-2019<br>+ alum | 9 µg SCB-2019<br>+ CpG + alum | 30 µg SCB-2019<br>+ CpG + alum | ChAdOx1-S    |
|                                                    | N = 30                  | N = 29                        | N = 32                         | N = 29       |
| <b>Sex, n (%)</b>                                  |                         |                               |                                |              |
| Male                                               | 15 (50)                 | 12 (41)                       | 12 (38)                        | 13 (45)      |
| Female                                             | 15 (50)                 | 17 (59)                       | 20 (63)                        | 16 (55)      |
| <b>Mean age ± SD, yr</b>                           | 43.4 ± 14.4             | 40.0 ± 13.6                   | 39.8 ± 12.1                    | 36.8 ± 12.7  |
| (Range)                                            | (20, 66)                | (21, 63)                      | (22, 63)                       | (21, 64)     |
| <b>Race, n (%)</b>                                 |                         |                               |                                |              |
| American Indian/Alaskan native                     | 0 (0)                   | 0 (0)                         | 0 (0)                          | 1 (3)        |
| Black or African American                          | 1 (3)                   | 4 (14)                        | 2 (6)                          | 4 (14)       |
| White                                              | 25 (83)                 | 22 (76)                       | 25 (78)                        | 21 (72)      |
| Other                                              | 2 (7)                   | 3 (10)                        | 4 (13)                         | 2 (7)        |
| Unknown/not reported                               | 2 (7)                   | 0 (0)                         | 1 (3)                          | 1 (3)        |
| <b>Ethnic group, n (%)</b>                         |                         |                               |                                |              |
| Hispanic or Latino                                 | 21 (70)                 | 26 (90)                       | 20 (63)                        | 19 (66)      |
| Not Hispanic or Latino                             | 2 (7)                   | 1 (3)                         | 9 (28)                         | 4 (14)       |
| Unknown/not reported                               | 7 (23)                  | 2 (7)                         | 3 (9)                          | 6 (21)       |
| <b>Mean body mass index ± SD, kg/m<sup>2</sup></b> | 28.5 (4.9)              | 28.9 (6.4)                    | 27.5 (5.6)                     | 27.8 (6.5)   |
| (Range)                                            | (19.8, 37.9)            | (17.3, 42.3)                  | (18.3, 46.3)                   | (20.0, 44.5) |
| <b>Risk of severe COVID-19<sup>a</sup>, n (%)</b>  |                         |                               |                                |              |
| Low                                                | 18 (60)                 | 18 (62)                       | 24 (75)                        | 21 (72)      |
| High                                               | 12 (40)                 | 11 (38)                       | 8 (25)                         | 8 (28)       |
| <b>COVID-19 infections during the study, n (%)</b> | 8 (27)                  | 7 (24)                        | 9 (28)                         | 6 (21)       |
| Time from vaccination, Mean ± SD, days             | 32.4 ± 12.0             | 44.3 ± 14.6                   | 24.0 ± 8.2                     | 43.2 ± 23.2  |
| (Range)                                            | (8, 47)                 | (32, 67)                      | (13, 37)                       | (8, 47)      |

a. Risk due to presence of known co-morbidities

**Table 2:** Geometric mean-fold rises (GMFR) at Days 15 and Day 29 from Day 0, and seroconversion rates (SCR) on Days 15 and 29 for antibodies against the prototype SARS-CoV-2 and four variants measured by microneutralization test (MNT<sub>50</sub>).

| Day                         | Booster vaccine | Group 1<br>9 µg SCIB-2019<br>+ alum | Group 2<br>9 µg SCIB-2019<br>+ CpG + alum | Group 3<br>30 µg SCIB-2019<br>+ CpG + alum | Group 4<br>ChAdOx1-S |
|-----------------------------|-----------------|-------------------------------------|-------------------------------------------|--------------------------------------------|----------------------|
| <b>PROTOTYPE SARS-CoV-2</b> |                 |                                     |                                           |                                            |                      |
| 15                          | n               | 24                                  | 25                                        | 25                                         | 25                   |
|                             | GMFR (95% CI)   | 10 (6–17)                           | 17 (10–30)                                | 15 (9–27)                                  | 4 (3–7)              |
|                             | SCR (95% CI)    | 79% (58–93)                         | 84% (64–96)                               | 84% (64–96)                                | 48% (28–69)          |
| 29                          | n               | 22                                  | 24                                        | 19                                         | 23                   |
|                             | GMFR (95% CI)   | 5 (3–7)                             | 6 (4–11)                                  | 13 (7–23)                                  | 3 (2–6)              |
|                             | SCR (95% CI)    | 64% (41–83)                         | 71% (49–87)                               | 84% (60–97)                                | 39% (20–62)          |
| <b>BETA variant</b>         |                 |                                     |                                           |                                            |                      |
| 15                          | n               | 24                                  | 25                                        | 25                                         | 25                   |
|                             | GMFR (95% CI)   | 7 (5–12)                            | 10 (6–18)                                 | 11 (7–20)                                  | 5 (3–7)              |
|                             | SCR (95% CI)    | 75% (53–90)                         | 76% (55–91)                               | 80% (59–93)                                | 52% (31–72)          |
| 29                          | n               | 22                                  | 24                                        | 19                                         | 23                   |
|                             | GMFR (95% CI)   | 6 (4–9)                             | 10 (6–17)                                 | 12 (7–20)                                  | 6 (3–12)             |
|                             | SCR (95% CI)    | 68% (45–86)                         | 83% (63–95)                               | 90% (67–99)                                | 61% (39–80)          |
| <b>GAMMA variant</b>        |                 |                                     |                                           |                                            |                      |
| 15                          | n               | 24                                  | 25                                        | 25                                         | 25                   |
|                             | GMFR (95% CI)   | 11 (7–18)                           | 14 (8–25)                                 | 15 (8–28)                                  | 5 (3–9)              |
|                             | SCR (95% CI)    | 79% (58–93)                         | 84% (64–96)                               | 80% (59–93)                                | 56% (35–76)          |
| 29                          | n               | 22                                  | 24                                        | 19                                         | 23                   |
|                             | GMFR (95% CI)   | 6 (4–9)                             | 8 (5–13)                                  | 13 (7–25)                                  | 4 (2–7)              |
|                             | SCR (95% CI)    | 68% (45–86)                         | 75% (53–90)                               | 79% (54–94)                                | 44% (23–66)          |
| <b>DELTA variant</b>        |                 |                                     |                                           |                                            |                      |
| 15                          | n               | 24                                  | 25                                        | 25                                         | 25                   |
|                             | GMFR (95% CI)   | 9 (5–14)                            | 11 (6–19)                                 | 17 (10–27)                                 | 5 (3–8)              |
|                             | SCR (95% CI)    | 75% (53–90)                         | 76% (55–91)                               | 88% (69–98)                                | 56% (35–76)          |
| 29                          | n               | 22                                  | 24                                        | 19                                         | 23                   |
|                             | GMFR (95% CI)   | 6 (4–11)                            | 7 (4–13)                                  | 16 (10–27)                                 | 5 (2–9)              |
|                             | SCR (95% CI)    | 68% (45–86)                         | 75% (53–90)                               | 90% (67–99)                                | 48% (27–69)          |
| <b>OMICRON variant</b>      |                 |                                     |                                           |                                            |                      |
| 15                          | n               | 24                                  | 25                                        | 25                                         | 25                   |
|                             | GMFR (95% CI)   | 4 (2–6)                             | 4 (3–7)                                   | 6 (4–10)                                   | 2 (1–4)              |
|                             | SCR (95% CI)    | 50% (29–71)                         | 64% (43–82)                               | 68% (47–85)                                | 20% (6.8–41)         |
| 29                          | n               | 22                                  | 24                                        | 19                                         | 23                   |
|                             | GMFR (95% CI)   | 4 (2–6)                             | 4 (2–6)                                   | 5 (3–8)                                    | 5 (2–9)              |
|                             | SCR (95% CI)    | 55% (32–76)                         | 58% (37–78)                               | 58% (34–80)                                | 52% (31–73)          |

Seroconversion defined as a four-fold increase in titer over baseline at Day 1 or from LLoQ if Day 1 titer was < LLoQ.

GMFR = Geometric mean fold rise from Day 1 at Day 15 or Day 29

**Table 3.** Reactogenicity in the 29 days after the booster doses of vaccines as indicated in the Safety population.

|                                                                                        | <b>Group 1</b>          | <b>Group 2</b>                | <b>Group 3</b>                 | <b>Group 4</b>     |
|----------------------------------------------------------------------------------------|-------------------------|-------------------------------|--------------------------------|--------------------|
| <b>Vaccine</b>                                                                         | 9 µg SCB-2019<br>+ alum | 9 µg SCB-2019<br>+ CpG + alum | 30 µg SCB-2019<br>+ CpG + alum | ChAdOx1-S          |
|                                                                                        | N = 30                  | N = 29                        | N = 32                         | N = 29             |
| <b>Any solicited local AE</b>                                                          | <b>8/28 (29%)</b>       | <b>11/27 (41%)</b>            | <b>14/30 (47%)</b>             | <b>9/27 (33%)</b>  |
| Mild                                                                                   | 7/28 (25%)              | 11/27 (41%)                   | 13/30 (43%)                    | 8/27 (30%)         |
| Moderate                                                                               | 1/28 (4%)               | 0/27 (0%)                     | 1/30 (3%)                      | 1/27 (4%)          |
| <b>Any solicited systemic AE</b>                                                       | <b>11/28 (39%)</b>      | <b>14/27 (52%)</b>            | <b>13/30 (43%)</b>             | <b>17/27 (63%)</b> |
| Mild                                                                                   | 9/28 (32%)              | 10/27 (37%)                   | 7/30 (23%)                     | 13/27 (48%)        |
| Moderate                                                                               | 2/28 (7%)               | 4/27 (15%)                    | 6/30 (20%)                     | 4/27 (15%)         |
| <b>Any unsolicited AE</b>                                                              |                         |                               |                                |                    |
| Any SOC                                                                                | 10 (33%)                | 19 (66%)                      | 16 (50%)                       | 11 (38%)           |
| Grade 3 related                                                                        | 0                       | 0                             | 0                              | 0                  |
| Grade 3 not related                                                                    | 0                       | 1                             | 0                              | 0                  |
| <b>Serious adverse events (SAE)</b>                                                    |                         |                               |                                |                    |
| Any                                                                                    | 0                       | 1 (3%)*                       | 0                              | 0                  |
| Related                                                                                | 0                       | 0                             | 0                              | 0                  |
| <b>Medically attended AE (MAAE)</b>                                                    | <b>5 (17%)</b>          | <b>7 (24%)</b>                | <b>9 (28%)</b>                 | <b>6 (21%)</b>     |
| <b>AE of special interest (AESI),<br/>AE leading to early withdrawal,<br/>or death</b> | 0                       | 0                             | 0                              | 0                  |

\* One participant suffered a leg fracture which was considered to be unrelated to the study.

## Figure legends

**Figure 1.** Study flow chart showing the disposition of the participants to each of the four groups.

**Figure 2.** Booster vaccination responses shown as geometric mean titers (95% CI) of ELISA antibodies against SCB-2019 (panel **A**) and ACE2 (panel **B**) at Days 15 and 29 after vaccination. Geometric mean-fold rises (GMFR) from Day 1 (95% CI) are shown with ANCOVA  $p$  values of differences between Groups 1-3 (SCB-2019) and Group 4 (ChAdOx1-S): \*  $p < 0.05$ ; \*\*  $p < 0.01$ , \*\*\*  $p < 0.001$ ). Numbers in columns are  $n$  values per group.

**Figure 3.** Booster vaccination responses shown as geometric mean neutralizing titers (with 95% CI) against the indicated SARS-CoV-2 variants 15 days after vaccination. Differences in GMTs of Groups 1-3 vs. Group 4 at Day 15 were tested by ANCOVA; \*  $p < 0.05$ ; \*\*  $p < 0.01$ ; \*\*\*  $p < 0.001$ .

**Figure 4.** Solicited local reactions and systemic adverse events occurring within 7 days of vaccination by severity reported as percentages of each group.

Figure 1

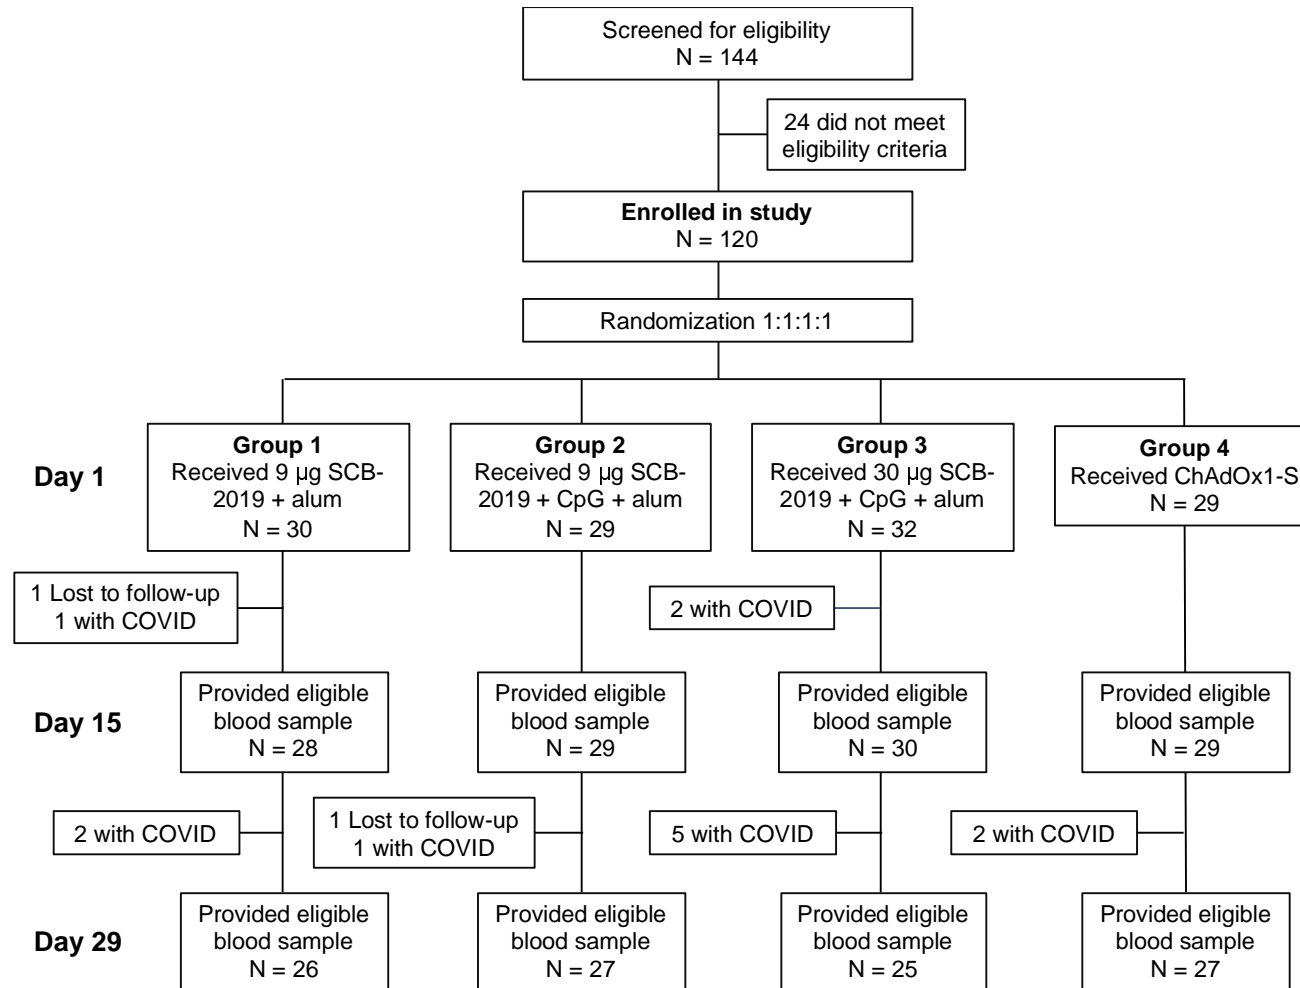

Figure 2.

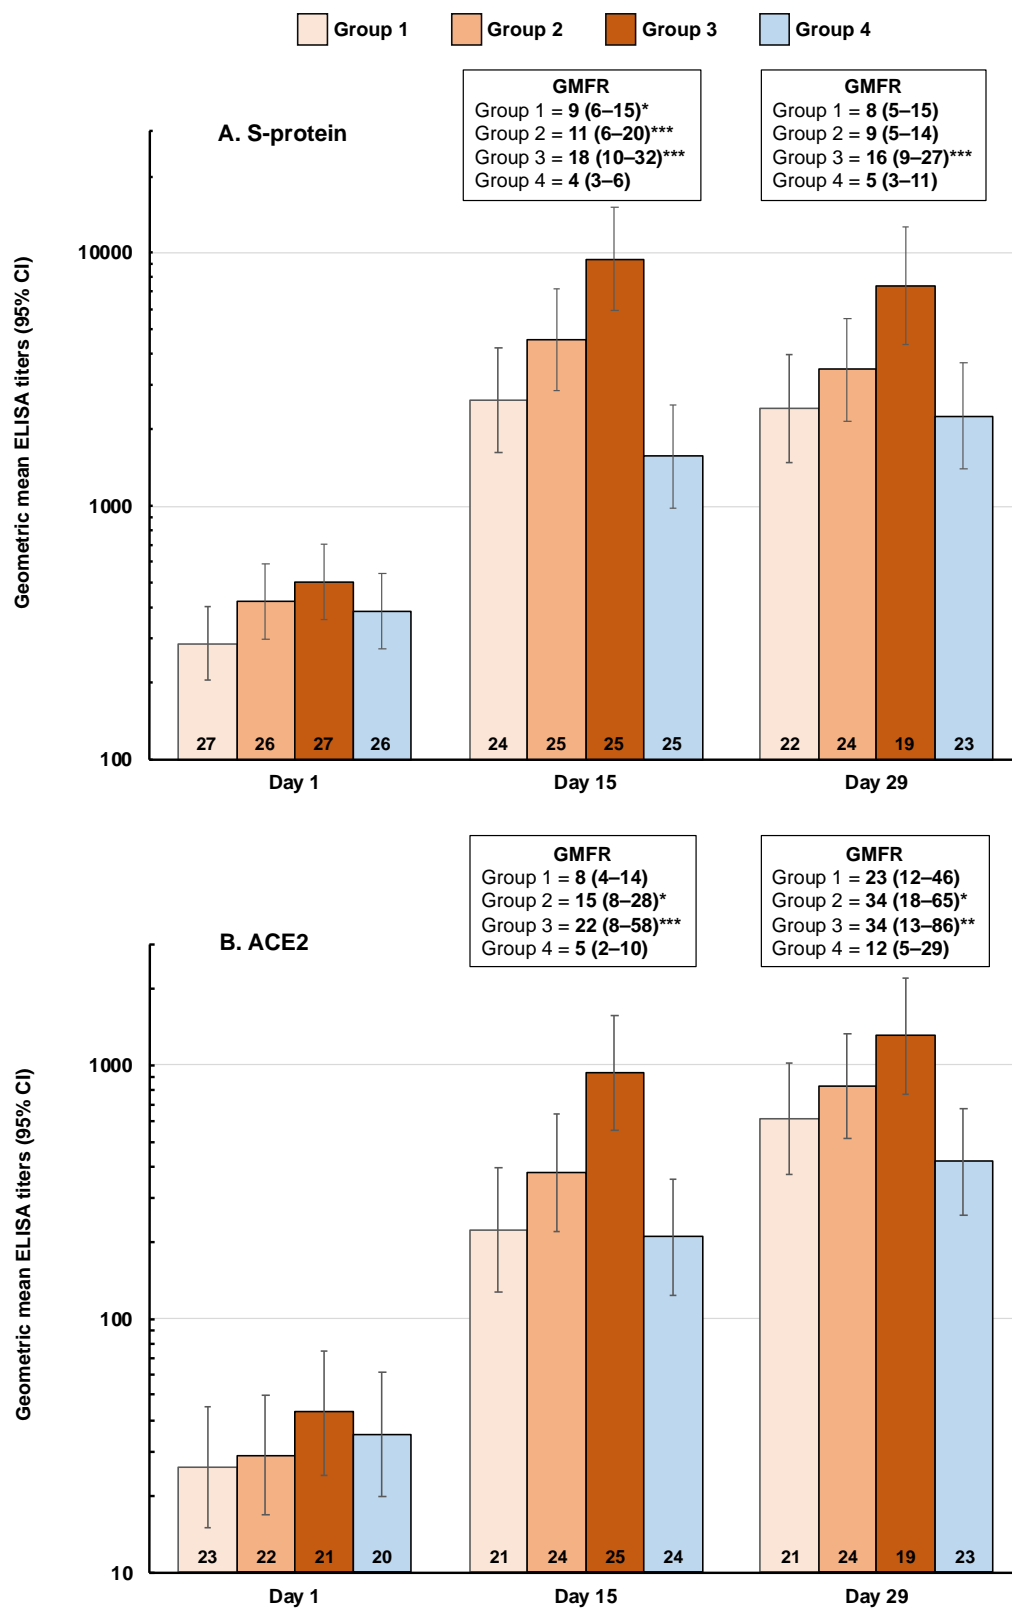



Figure 3.

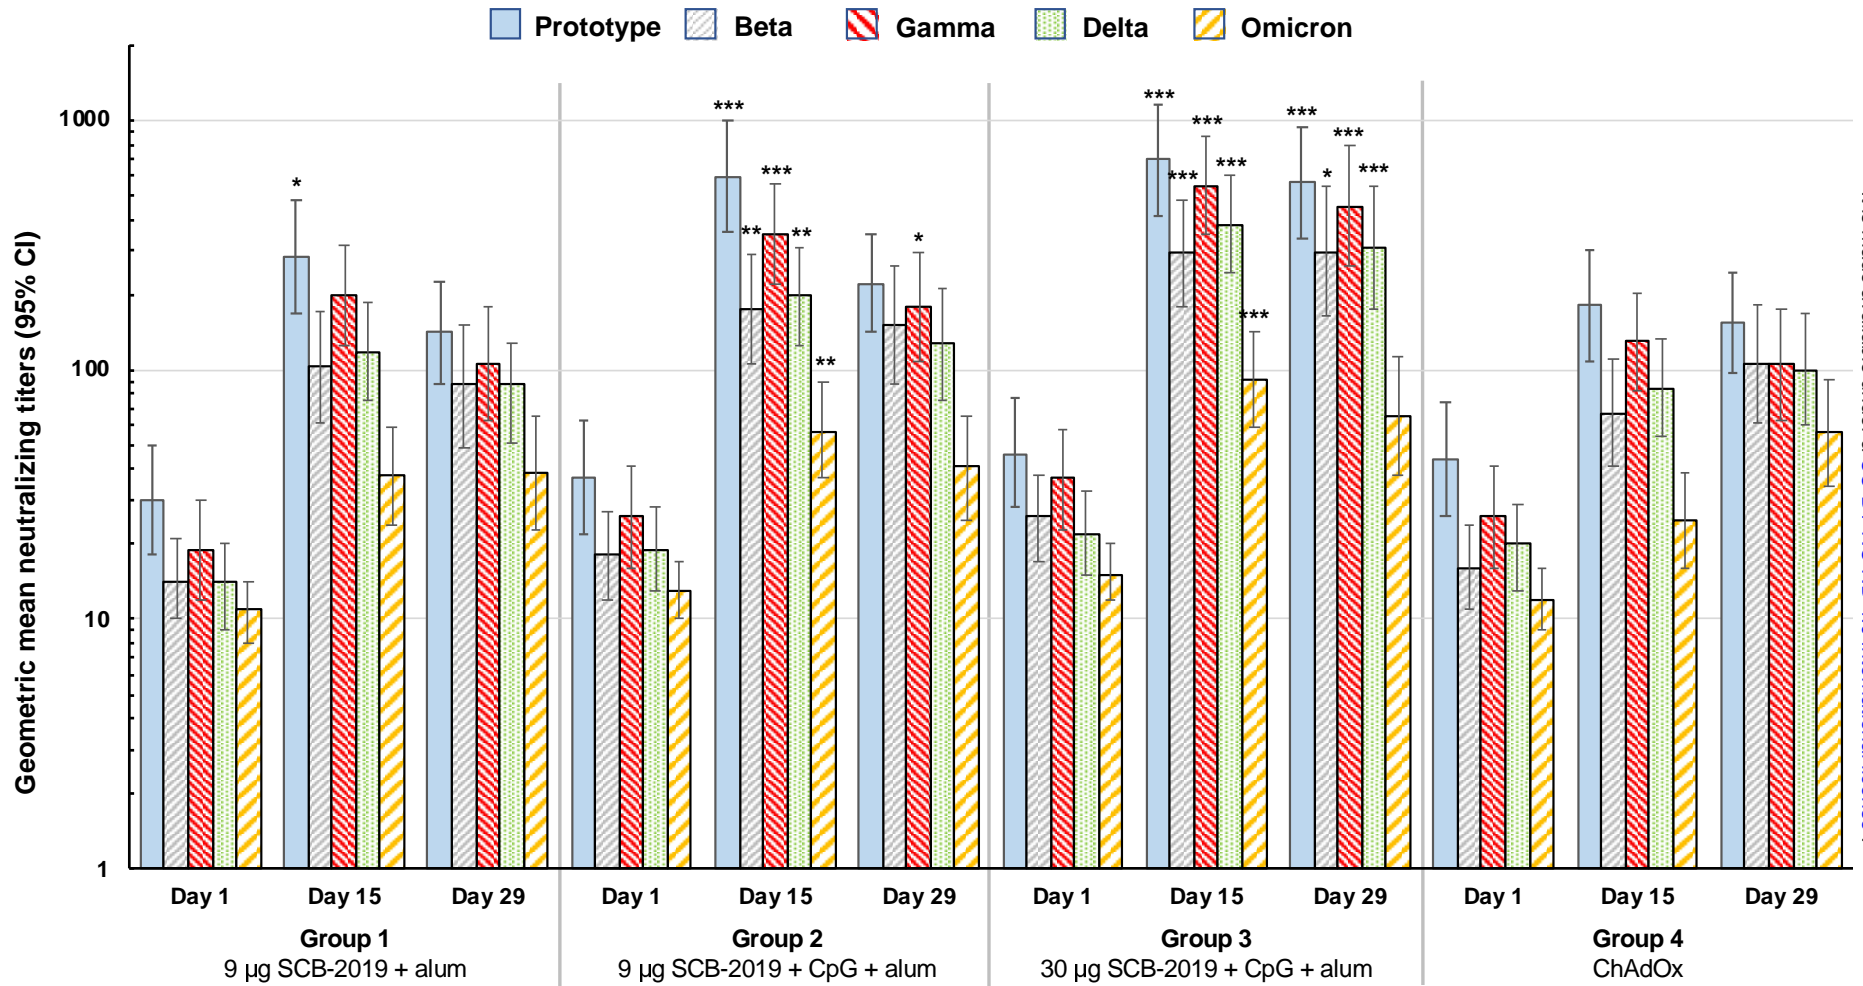

Figure 4.

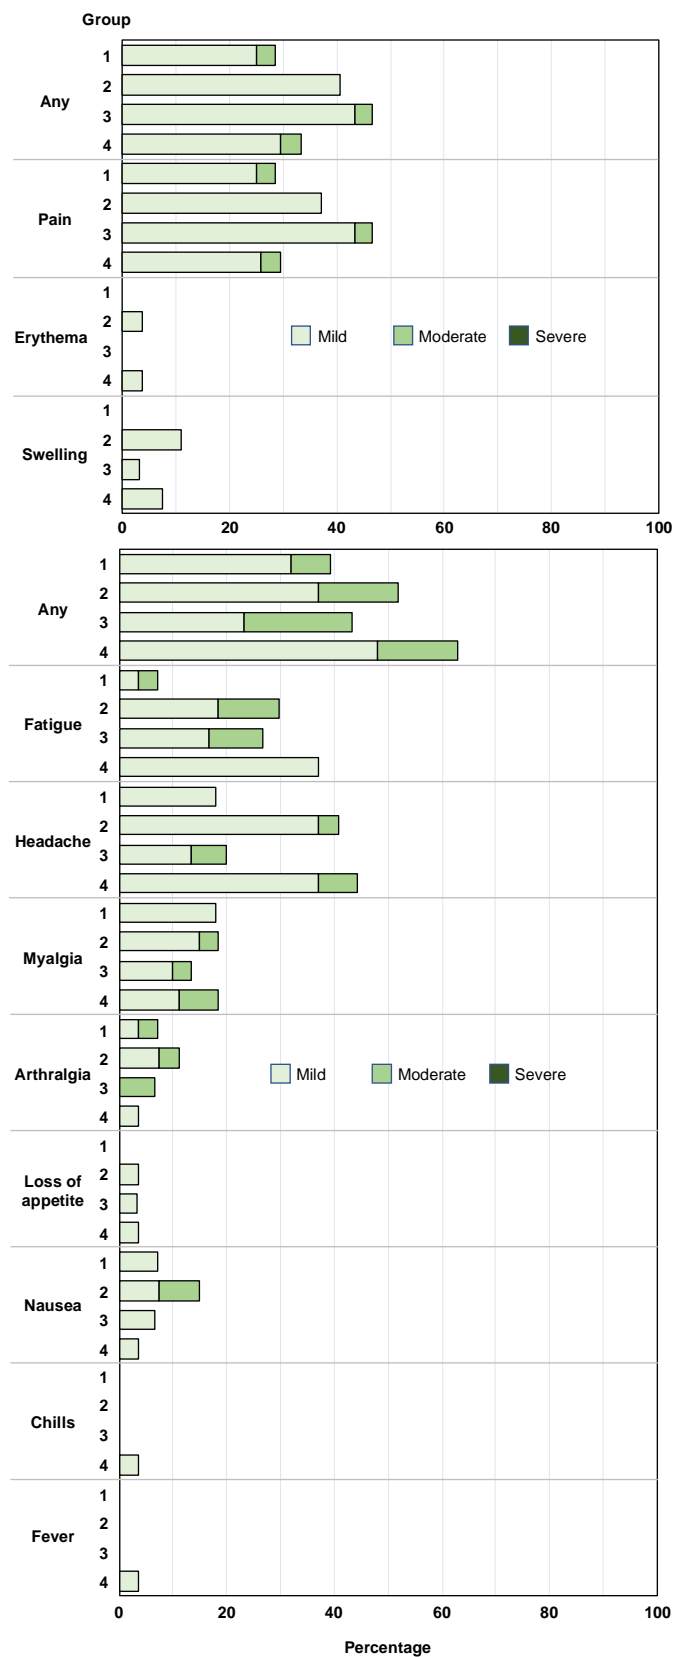

Source: https://medrxiv.org/content/medrxiv/early/2022/06/02/2022.05.31.22275010.full.pdf
